# Supplementary material for: Development and Characterization of Transcription Factor Gene-Derived Microsatellite (TFGM) Markers in Medicago truncatula and Their Transferability in Leguminous and Non-Leguminous Species
Source: MDPI journal article supplement (doi:10.3390/molecules20058759), 2015-05-15
Supplement: s1 [file s1]

## Supplementary Material

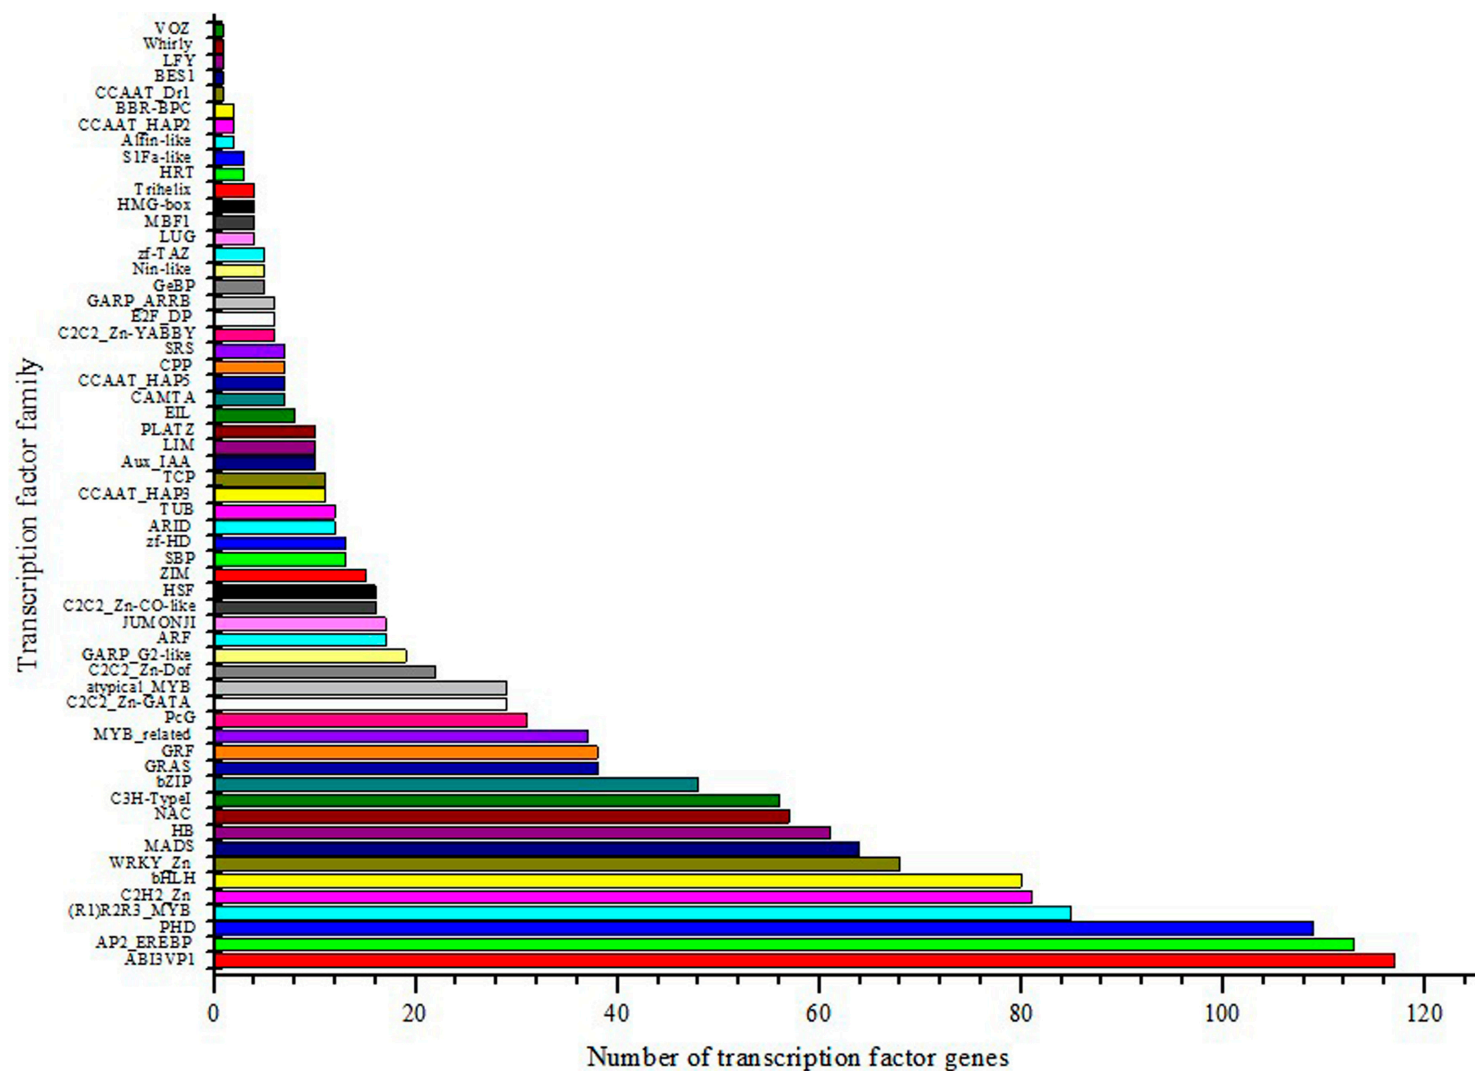

**Figure S1.** The number of genes in *M. truncatula* transcription factor families.
